# Supplementary material for: Synthesis of high quality inorganic fullerene-like BN hollow spheres via a simple chemical routeElectronic supplementary information (ESI) available: XPS spectrum of as-prepared h-BN. See http://www.rsc.org/suppdata/cc/b3/b308264d/
Source: Royal Society of Chemistry journal article supplement (doi:10.1039/b308264d), 2003-01-01
Supplement: b308264d.doc [file b308264d.doc]

# Supplementary information


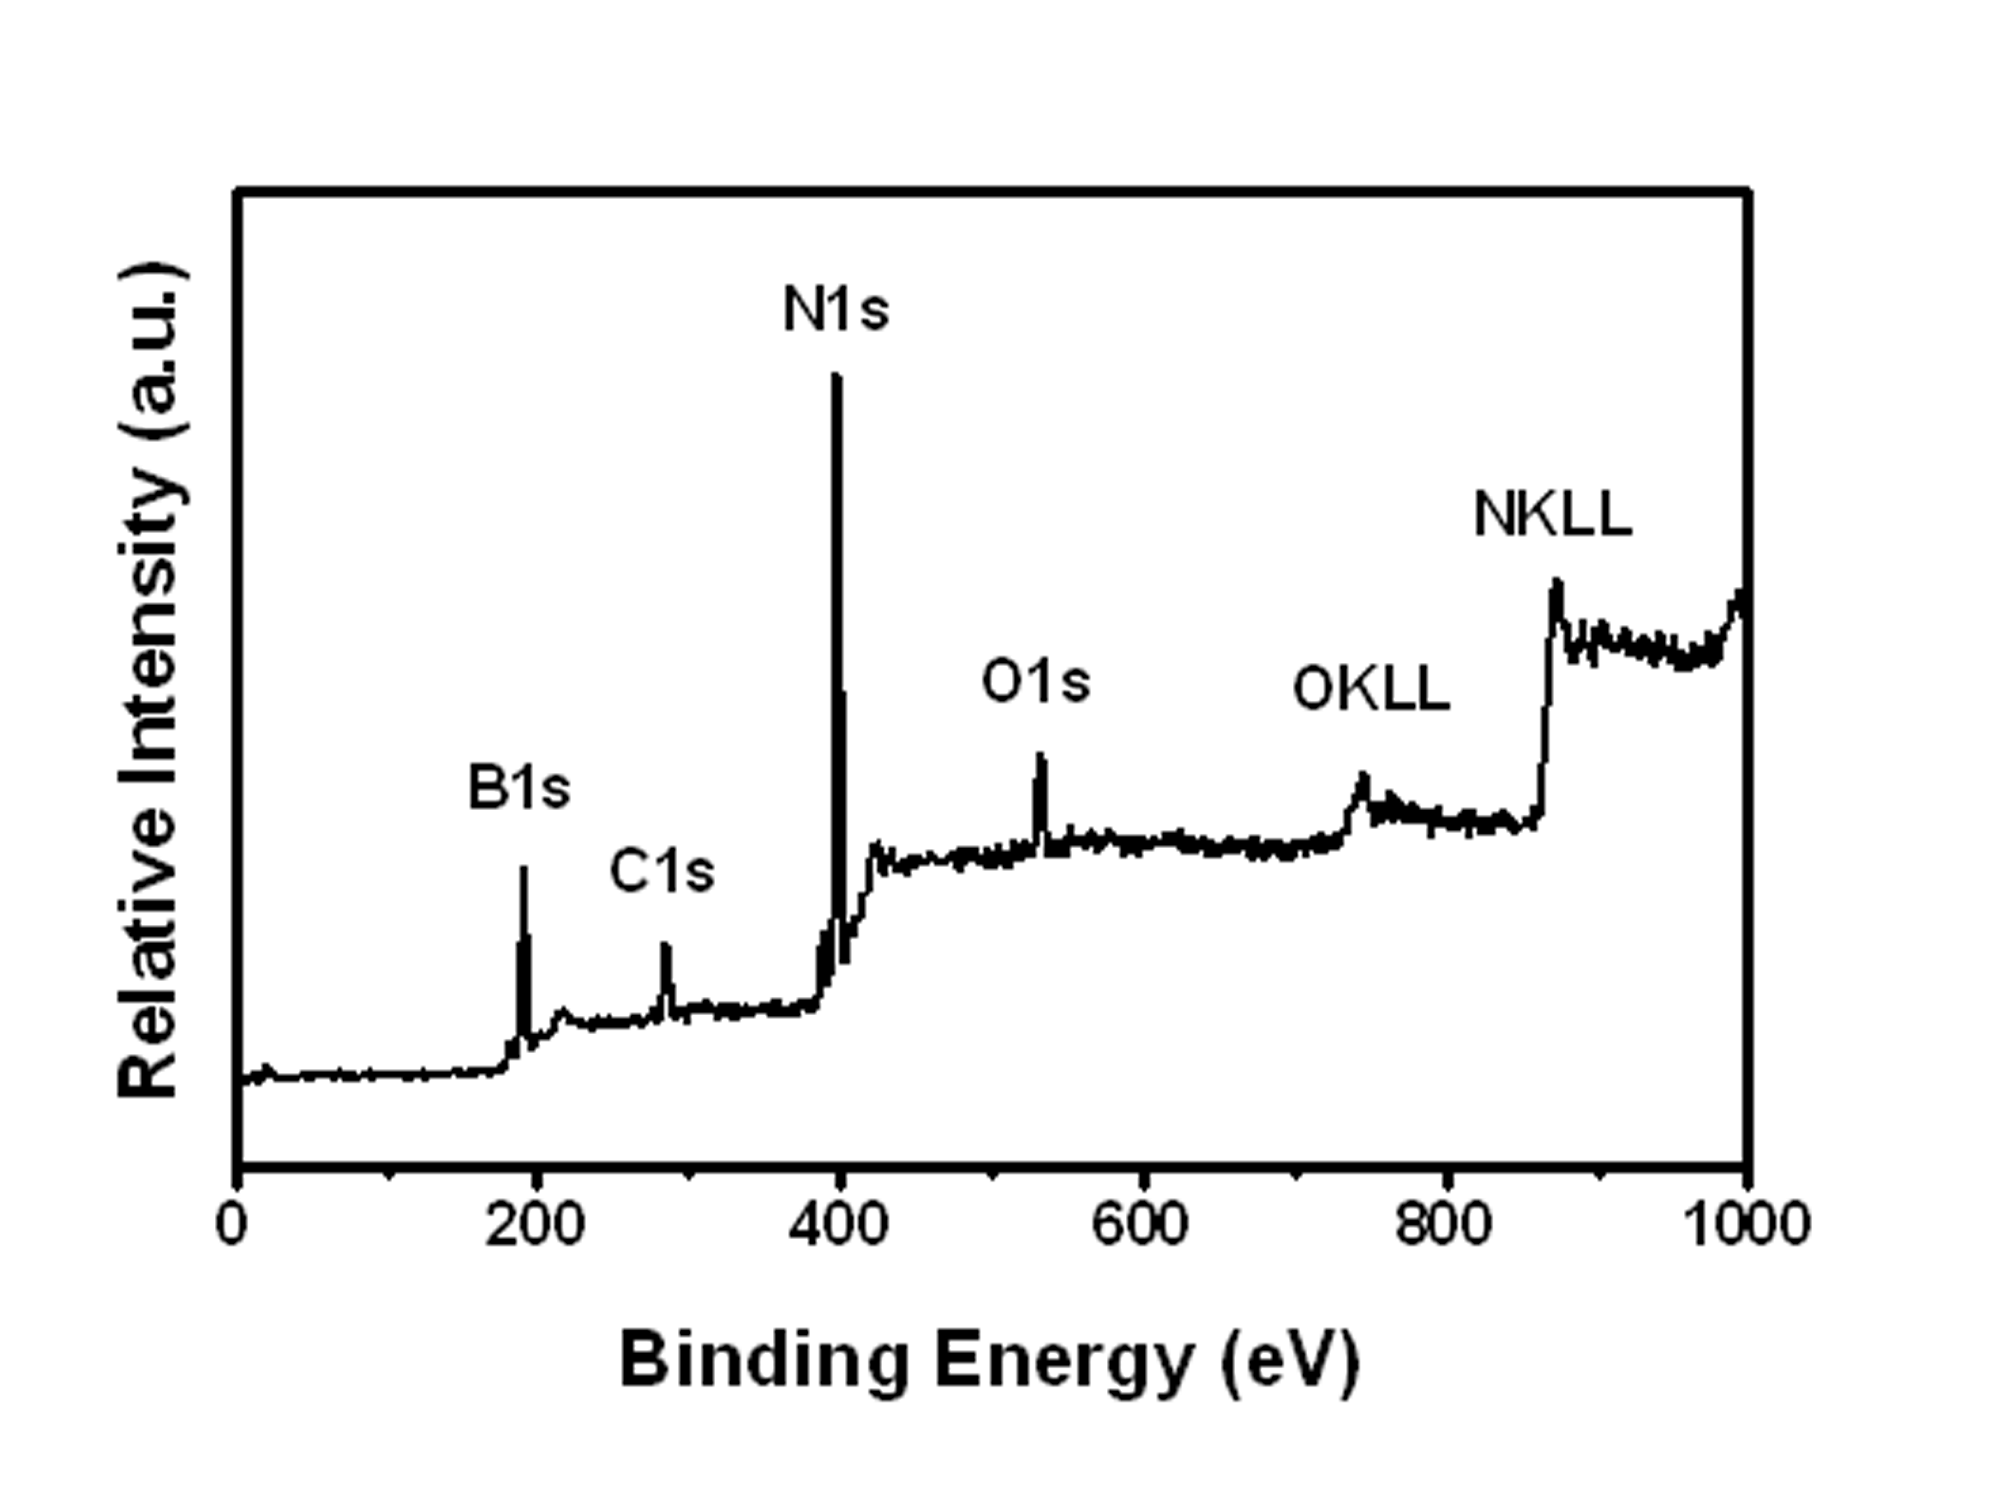


**Fig.S1** The Survey Spectrum of as-prepared h-BN

The binding energies obtained in the XPS analysis are standardized for specimen charging using C1s as the reference at 284.6eV.No peaks of other elements except C, O, B, N, are observed on the Fig.S1. The peaks for O can be attributed to the O2, CO2, or H2O absorbing on the surface of the samples.
